# Supplementary material
Source: Royal Society of Chemistry journal article supplement (doi:10.1039/d6gc01429a)
Supplement: d6gc01429a1.pdf [file d6gc01429a1.pdf]

# **Mechanistic Insights into Solvent-Assisted BHMF Hydrogenation: Diatomic Catalysts Beyond Conventional Pathways**

Liyuan Huai,<sup>a,b,\*</sup> Jian Zhang,<sup>a,\*</sup> William A. Goddard III<sup>b,\*</sup>

<sup>a</sup> Ningbo Institute of Materials Technology & Engineering, Chinese Academy of Sciences, 1219 Zhongguan West Road, Ningbo, Zhejiang, 315201, China; University of the Chinese Academy of Sciences, Beijing, 100049, China;

<sup>b</sup> Materials and Process Simulation Center, California Institute of Technology, Pasadena, CA, 91125, USA

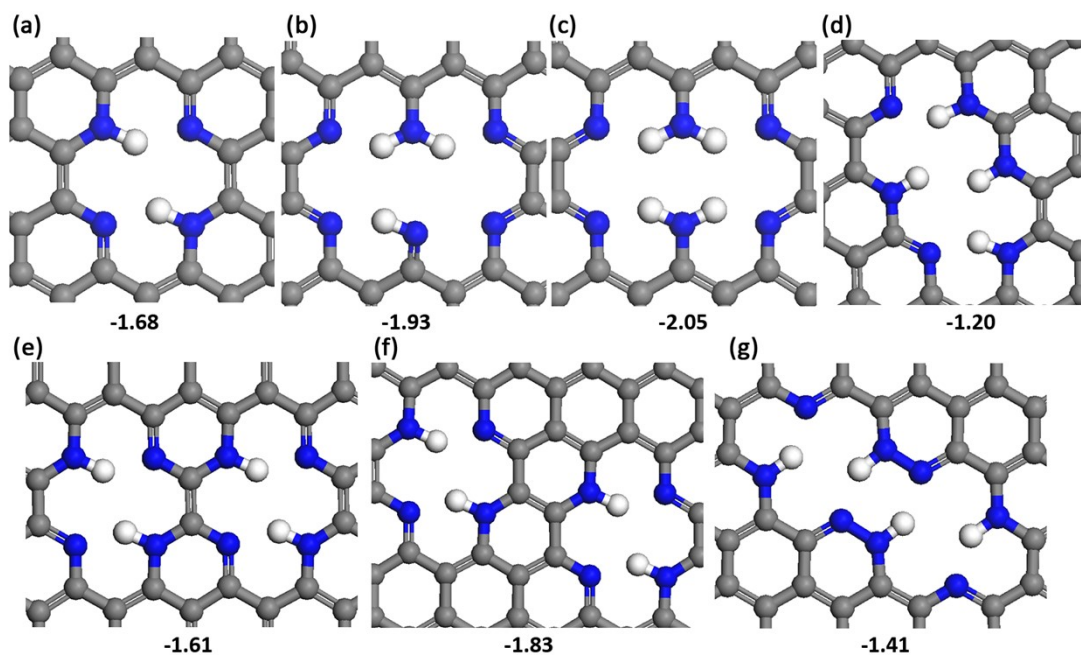

**Figure S1.** Calculated average H adsorption energies (eV) for various N-doping motifs.

### The construction method of N-doped defective graphene.

The defective graphene model was constructed by removing two carbon atoms to create a divacancy defect, followed by substituting the six undercoordinated carbon atoms around the defect with nitrogen atoms, forming the defective configuration. The adsorption of H was calculated to evaluate the structural stability.

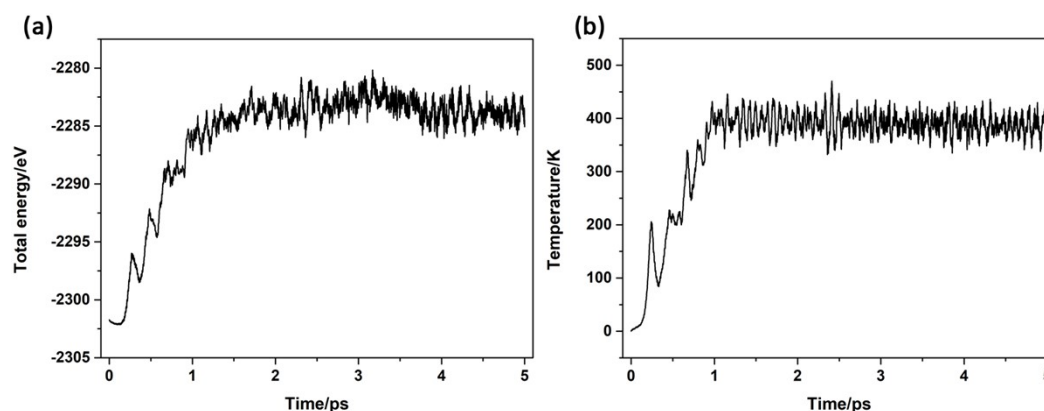

**Figure S2.** The change of total energy (a) and temperature (b) during the AIMD simulations.

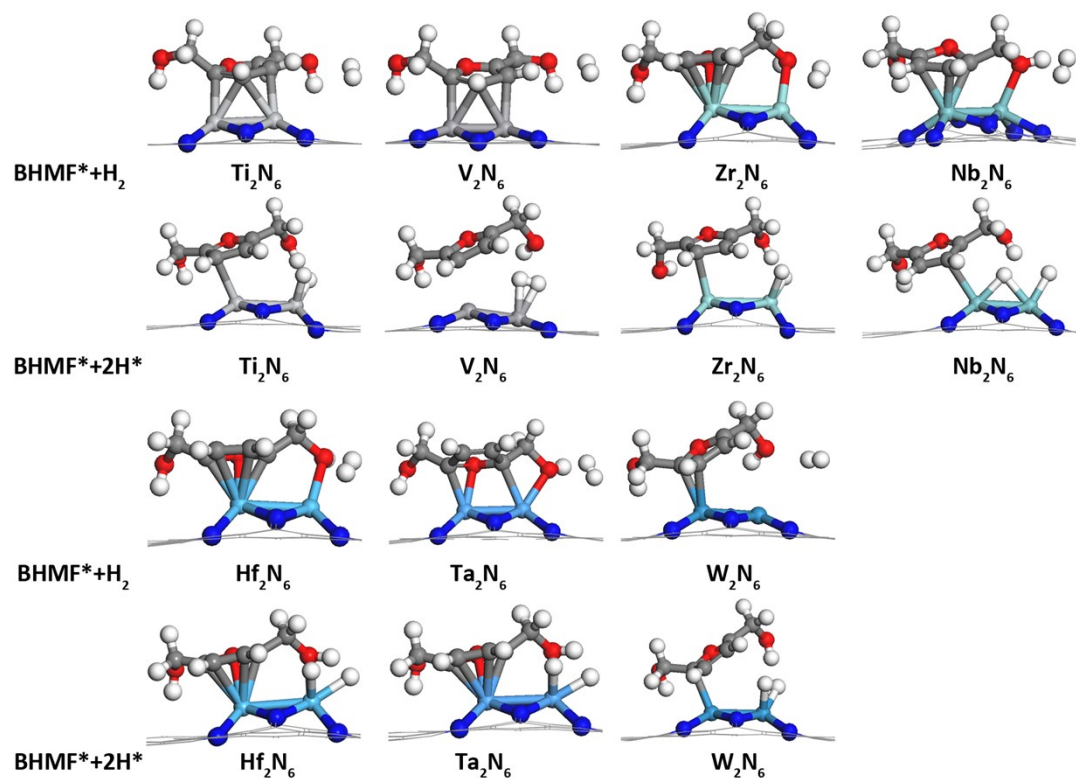

**Figure S3.** The coadsorption structures of BHMF and H<sub>2</sub>, BHMF and 2H on Ti, V, Zr, Nb, Hf, Ta and W DACs surfaces.

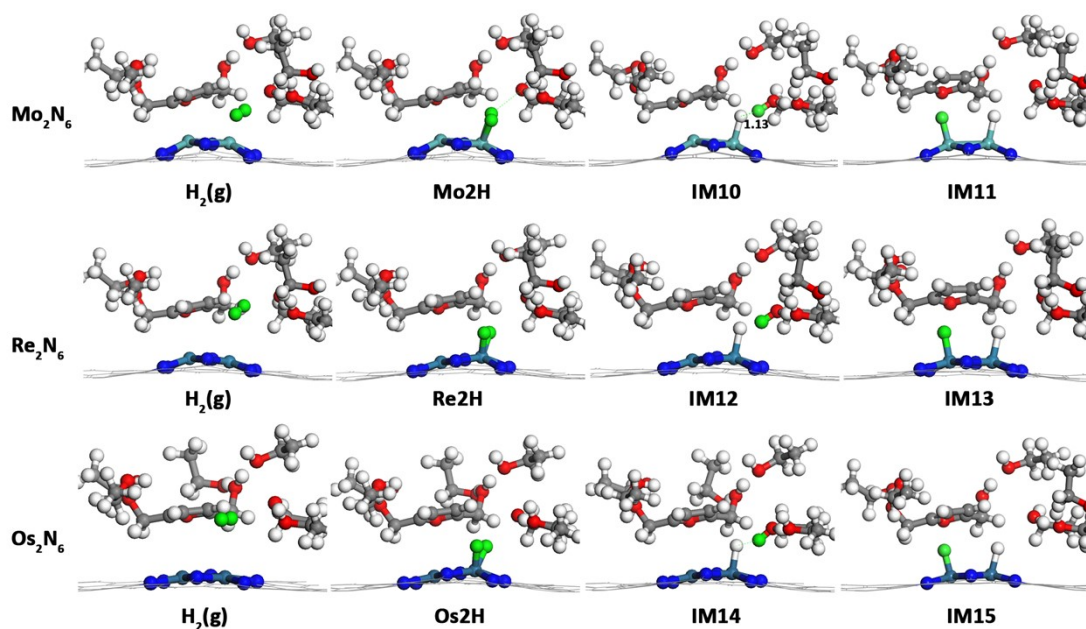

**Figure S4.** The optimized structures during the H<sub>2</sub> dissociation and the diffusion of H on Mo, Re and Os DACs.

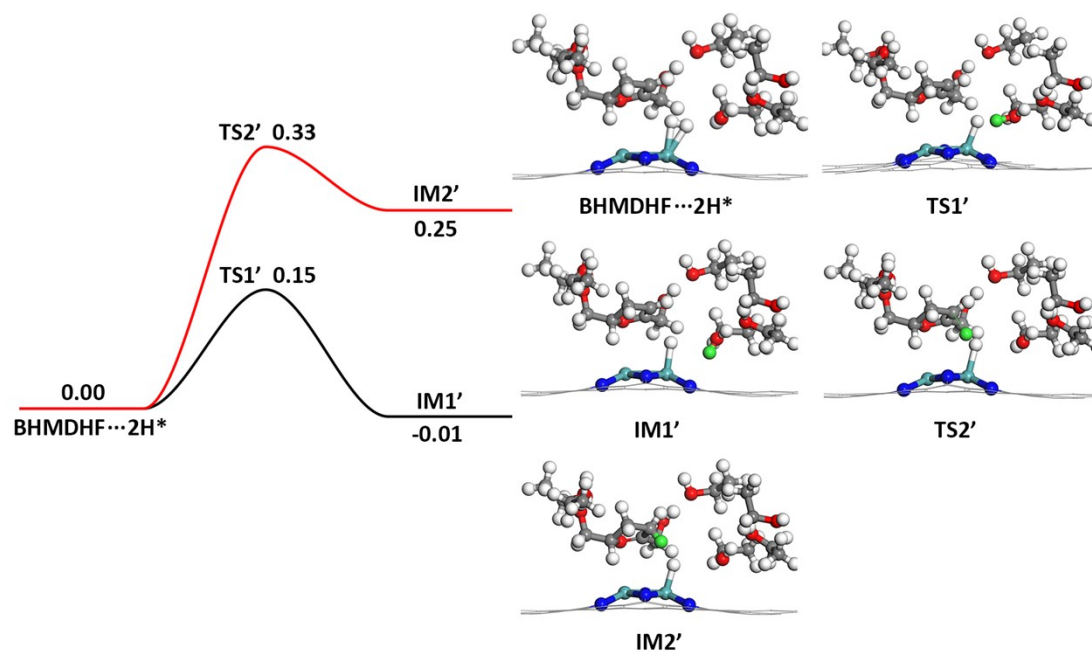

**Figure S5.** The pathways for hydrogen diffusion to EtOH and direct hydrogenation of BHMDHF via Mo<sub>2</sub>H on Mo DAC.

**Table S1.** Calculated interaction energies ( $E_{\text{int}}$ , eV) of typical intermediates with ethanol solvent during ring hydrogenation and hydrodeoxygenation on Ru DACs.

| Intermediates                          | $E_{\text{int}}$ (eV) |
|----------------------------------------|-----------------------|
| 1 BHMF (Ring hydrogenation)            | -3.33                 |
| 2 BHMDHF (Ring hydrogenation)          | -1.22                 |
| 3 BHMF (Side chain hydrodeoxygenation) | -4.47                 |

**Table S2.** Calculated the reaction energies ( $E_r$ , eV) for H<sub>2</sub> dissociative adsorption on two separate metal sites as well as the dissociation barrier ( $E_a$ , eV) on Fe DAC.

| Catalysts | $E_r$ (eV) | $E_a$ (eV) |
|-----------|------------|------------|
| 1 Fe DAC  | 0.26       | 1.49       |
| 2 Co DAC  | 1.03       | /          |
| 3 Ni DAC  | 2.32       | /          |
| 4 Ir DAC  | 0.89       | /          |
| 5 Rh DAC  | 1.06       | /          |

## Microkinetic Model on Ru and Mo DACs.

### 1. Site balance equation

The total coverage of surface active sites is conserved:

$$\theta_{\text{BHMF}} + \theta_{\text{H}} + \theta_{\text{BHMFFH}} + \theta_{\text{BHMDHF}} + \theta_{\text{BHMDHFH}} + \theta_{\text{BHMTFH}} + \theta_{\text{BHMF-OH}} + \theta_{\text{5-MFA}} + \theta_{*} = 1 \quad (1)$$

Where  $\theta_i$  denotes the surface coverage of intermediate i, and  $\theta_{*}$  is the coverage of free active sites.

### 2. Steady-state approximation (SSA) for surface intermediates

Under steady-state conditions, the net formation rate of each surface intermediate is zero ( $d\theta_i/dt = 0$ ):

$$\frac{d\theta_{\text{BHMFFH}}}{dt} = k_3\theta_{\text{BHMF}}\theta_{\text{H}} - k_4\theta_{\text{BHMFFH}}\theta_{\text{H}} = 0 \quad (2)$$

$$\frac{d\theta_{\text{BHMDHF}}}{dt} = k_4\theta_{\text{BHMFFH}}\theta_{\text{H}} - k_5\theta_{\text{BHMDHF}}\theta_{\text{H}} = 0 \quad (3)$$

$$\frac{d\theta_{\text{BHMDHFH}}}{dt} = k_5\theta_{\text{BHMDHF}}\theta_{\text{H}} - k_6\theta_{\text{BHMDHFH}}\theta_{\text{H}} = 0 \quad (4)$$

$$\frac{d\theta_{\text{BHMTFH}}}{dt} = k_6\theta_{\text{BHMDHFH}}\theta_{\text{H}} - k_7\theta_{\text{BHMTFH}} = 0 \quad (5)$$

$$\frac{d\theta_{\text{BHMF-OH}}}{dt} = k_8\theta_{\text{BHMF}}\theta_{\text{H}} - k_9\theta_{\text{BHMF-OH}}\theta_{\text{H}} = 0 \quad (6)$$

$$\frac{d\theta_{\text{MFA}}}{dt} = k_9\theta_{\text{BHMF-OH}}\theta_{\text{H}} - k_{10}\theta_{\text{5-MFA}} = 0 \quad (7)$$

Where  $k_i$  ( $i = 3, \dots, 10$ ) denote the rate constants of the elementary steps.

### 3. Coverage of reactants

BHMF and H adsorption is treated as a quasi-equilibrium step:

$$\theta_{\text{BHMF}} = P_{\text{BHMF}}K_{\text{BHMF}}\theta_{*} = c_{\text{BHMF}}RTK_{\text{BHMF}}\theta_{*}; \quad \theta_{\text{H}} = \sqrt{P_{\text{H}_2}K_{\text{H}_2}}\theta_{*}$$

Where

$P_{\text{BHMF}}$  : partial pressure of BHMF;

$c_{\text{BHMF}}$  : concentration of BHMF in solution;

$K_{\text{BHMF}}$  : adsorption equilibrium constant of BHMF;

$P_{\text{H}_2}$  : partial pressure of H<sub>2</sub>;

$K_{\text{H}_2}$  : adsorption equilibrium constant of H<sub>2</sub>;

$R$ : ideal gas constant;

$T$ : reaction temperature.

For calculating the adsorption equilibrium constant ( $K$ ), we used:  $K = \exp[-(\Delta E_{\text{ads}} - T\Delta S)/k_{\text{B}}T]$ , where  $\Delta E_{\text{ads}}$  is the adsorption energy that incorporates vibrational corrections, and  $\Delta S$  is the entropy change associated with the adsorption process. The rate constant  $k$  for each reaction step is derived from the Eyring equation,

$$k = \left(\frac{k_{\text{B}}T}{h}\right) e^{\left(\frac{\Delta S}{k_{\text{B}}}\right)} e^{\left(\frac{-\Delta H}{k_{\text{B}}T}\right)}$$

where,  $k_{\text{B}}$  is the Boltzmann constant,  $T$  is the temperature, and  $h$  represents Planck's constant.  $\Delta S$  denotes the entropy change, while  $\Delta H$  corresponds to the enthalpy change during the reaction at temperature  $T$ . The enthalpy changes ( $\Delta H$ ) were directly obtained from DFT calculations, while the entropy changes ( $\Delta S$ ) were determined by vibrational frequency analysis. Both  $\Delta H$  and  $\Delta S$  were calculated as the differences between the transition state and the reactants, with the corresponding data generated via VASPkit.<sup>1</sup>

#### 4. Analytical coverage expressions of intermediates

From the steady-state equations (2)–(7), the coverage of each intermediate can be analytically derived:

$$\theta_{\text{BHMFH}} = k_3\theta_{\text{BHMF}}/k_4$$

$$\theta_{\text{BHMDHF}} = k_3\theta_{\text{BHMF}}/k_5$$

$$\theta_{\text{BHMDHFH}} = k_3\theta_{\text{BHMF}}/k_6$$

$$\theta_{\text{BHMTHF}} = k_3\theta_{\text{BHMF}}\theta_{\text{H}}/k_7$$

$$\theta_{\text{BHMF-OH}} = k_8\theta_{\text{BHMF}}/k_9$$

$$\theta_{\text{5-MFA}} = k_8\theta_{\text{BHMF}}\theta_{\text{H}}/k_{10}$$

#### 5. Formation rates and selectivity of main products

The formation rates of the two dominant products are written as:

$$r_{\text{BHMTHF}} = k_7\theta_{\text{BHMTHF}}, r_{\text{5-MFA}} = k_{10}\theta_{\text{5-MFA}}, \text{ respectively.}$$

The product selectivity can be further calculated from the ratio of formation rates:

$$S_{\text{BHMTHF}} = r_{\text{BHMTHF}}/(r_{\text{5-MFA}} + r_{\text{BHMTHF}}), S_{\text{5-MFA}} = r_{\text{5-MFA}}/(r_{\text{5-MFA}} + r_{\text{BHMTHF}})$$

#### References

1. V. WANG, N. XU, J.-C. LIU, G. TANG, W.-T. GENG, VASPKIT: A User-Friendly Interface Facilitating High-Throughput Computing and Analysis Using VASP Code, *Computer Physics Communications*. **2021**, 267, 108033, DOI: 10.1016/j.cpc.2021.108033
